# Supplementary material for: Epithelial-mesenchymal transition-associated microRNA/mRNA signature is linked to metastasis and prognosis in clear-cell renal cell carcinoma
Source: PubMed Central journal article supplement (PMC4994011; doi:10.1038/srep31852), 2016-08-23
Supplement: srep31852-s1.pdf [file srep31852-s1.pdf]

## Epithelial-mesenchymal transition-associated microRNA/mRNA signature is linked to metastasis and prognosis in clear-cell renal cell carcinoma

Hana Mlcochova, Tana Machackova, Anja Rabien, Lenka Radova, Pavel Fabian, Robert Iliev, Katerina Slaba, Alexandr Poprach, Ergin Kilic, Michal Stanik, Martina Redova-Lojova, Marek Svoboda, Jan Dolezel, Rostislav Vyzula, Klaus Jung, Ondrej Slaby

### Supplementary data

Supplementary Table S1 List of the antibodies used for immunofluorescence analysis of EMT markers.

| Probe name        | Primary antibody               | Clone      | Dilution | Cat              | Lot        | Company                       | Secondary antibody           |
|-------------------|--------------------------------|------------|----------|------------------|------------|-------------------------------|------------------------------|
| <b>E-cadherin</b> | Purified Mouse Anti-E-Cadherin | CDH1       | 1:50     | 610182           | 2104735    | BD Transduction Laboratories™ | alpha m Alexa 488 (1:100)*   |
| <b>CK-18</b>      | Mouse Anti-Cytokeratin 18      | DC-10      | 1:1000   | MU143-UC         | MU1430413  | BioGenex                      | alpha m Alexa 488 (1:100) *  |
| <b>CK-19</b>      | Rabbit Anti-Cytokeratin 19     | EP1580Y    | 1:500    | 1968-1 (ab52625) | GR26970-6  | Epitomics (Abcam)             | alpha rb Alexa 594 (1:50) ** |
| <b>Vimentin</b>   | Monoclonal Mouse Anti-Vimentin | V9         | 1:1000   | M0725            | 20002900   | Dako                          | alpha m Alexa 488 (1:100) *  |
| <b>S100A4</b>     | Rabbit Anti-S100A4 antibody    | EPR2761(2) | 1:250    | ab124805         | GR154927-1 | Abcam                         | alpha rb Alexa 594 (1:50) ** |

\*Alexa Fluor 488 F(ab')<sub>2</sub> Fragment of Goat anti- Mouse IgG (H+L). Code A-11017. Lot 1107471. Life Technologies

\*\*Alexa Fluor 594 F(ab')<sub>2</sub> Fragment of Goat anti- Rabbit IgG (H+L). Code A-11072. Lot 948493. Life Technologies

Supplementary Table S2 List of miRNA expression qPCR assays used in training and validation phase of the study.

| miRBase ID<br>Release version 21 | miRBase Accession<br>No.               | AB assay name  | AB assay ID | Mature miRNA Sequence                                              |
|----------------------------------|----------------------------------------|----------------|-------------|--------------------------------------------------------------------|
| hsa-miR-17-3p                    | MIMAT0000071                           | hsa-miR-17*    | 2421        | ACUGCAGUGAAGGCACUUGUAG                                             |
| hsa-miR-26a-1-3p                 | MIMAT0004499                           | hsa-miR-26a-1* | 2443        | CCUUAUUCUUGGUUACUUGCACG                                            |
| hsa-miR-30a-3p                   | MIMAT0000088                           | hsa-miR-30a-3p | 416         | CUUUCAGUCGGAUGUUUGCAGC                                             |
| hsa-miR-30a-5p                   | MIMAT0000087                           | hsa-miR-30a-5p | 417         | UGUAAACAUCCUCGACUGGAAG                                             |
| hsa-miR-30b-5p                   | MIMAT0000420                           | hsa-miR-30b    | 602         | UGUAAACAUCCUACACUCAGCU                                             |
| hsa-miR-30c-5p                   | MIMAT0000244                           | hsa-miR-30c    | 419         | UGUAAACAUCCUACACUCUCAGC                                            |
| hsa-miR-30d-3p                   | MIMAT0004551                           | hsa-miR-30d*   | 2305        | CUUUCAGUCAGAUGUUUGCUGC                                             |
| hsa-miR-30e-5p                   | MIMAT0000692                           | hsa-miR-30e    | 2223        | UGUAAACAUCCUUGACUGGAAG                                             |
| hsa-miR-30e-3p                   | MIMAT0000693                           | hsa-miR-30e-3p | 422         | CUUUCAGUCGGAUGUUUACAGC                                             |
| hsa-miR-130b-5p                  | MIMAT0004680                           | hsa-miR-130b*  | 2114        | ACUCUUUCCUGUUGCACUAC                                               |
| hsa-miR-141-3p                   | MIMAT0000432                           | hsa-miR-141    | 463         | UAACACUGUCUGGUAAAAGAUGG                                            |
| hsa-miR-192-3p                   | MIMAT0004543                           | hsa-miR-192*   | 2272        | CUGCCAAUUCUAGGUCACAG                                               |
| hsa-miR-193b-3p                  | MIMAT0002819                           | hsa-miR-193b   | 2367        | AACUGGCCCUCAAAGUCCCGCU                                             |
| hsa-miR-200a-3p                  | MIMAT0000682                           | hsa-miR-200a   | 502         | UAACACUGUCUGGUAAACGAUGU                                            |
| hsa-miR-200a-5p                  | MIMAT0001620                           | hsa-miR-200a*  | 1011        | CAUCUUACCGGACAGUCUGGA                                              |
| hsa-miR-200b-3p                  | MIMAT0000318                           | hsa-miR-200b   | 2251        | UAAUACUGCCUGGUAAUGAUGA                                             |
| hsa-miR-200b-5p                  | MIMAT0004571                           | hsa-miR-200b*  | 2274        | CAUCUUACUGGGCAGCAUUGGA                                             |
| hsa-miR-200c-3p                  | MIMAT0000617                           | hsa-miR-200c   | 2300        | UAAUACUGCCGGUAAUGAUGG<br>A                                         |
| hsa-miR-215-5p                   | MIMAT0000272                           | hsa-miR-215    | 518         | AUGACCUAUGAAUUGACAGAC                                              |
| hsa-miR-429                      | MIMAT0001536                           | hsa-miR-429    | 1024        | UAAUACUGUCUGGUAAAACCGU                                             |
| hsa-miR-571                      | MIMAT0003236                           | hsa-miR-571    | 1613        | UGAGUUGGCCAUCUGAGUGAG                                              |
| hsa-miR-630                      | MIMAT0003299                           | hsa-miR-630    | 1563        | AGUAUUCUGUACCAGGGAAGGU                                             |
| hsa-miR-632                      | MIMAT0003302                           | hsa-miR-632    | 1572        | GUGUCUGCUUCCUGUGGGA                                                |
| hsa-miR-770-5p                   | MIMAT0003948                           | hsa-miR-770-5p | 2002        | UCCAGUACCAGUGUCAGGGCCA                                             |
| RNU48                            | NCBI Accession<br>Number:<br>NR_002745 | RNU48          | 1006        | GATGACCCAGGTA ACTCTGAGTG<br>TGTCGCTGATGCCATCACC GCAGC<br>GCTCTGACC |

Supplementary Table S3 List of gene expression qPCR assays used in training and validation phase of the study.

| Gene symbol | Entrez Gene ID | Gene name                                                                           | Assay name | Assay ID      |
|-------------|----------------|-------------------------------------------------------------------------------------|------------|---------------|
| SCD         | 6319           | stearoyl-CoA desaturase (delta-9-desaturase)                                        | SCD        | Hs01682761_m1 |
| PAPSS2      | 9060           | 3'-phosphoadenosine 5'-phosphosulfate synthase 2                                    | PAPSS2     | Hs00989928_m1 |
| SEPT14      | 346288         | septin 14                                                                           | SEPT14     | Hs01121472_m1 |
| KMO         | 8564           | kynurenine 3-monooxygenase (kynurenine 3-hydroxylase)                               | KMO        | Hs00175738_m1 |
| ZNF343      | 79175          | zinc finger protein 343                                                             | ZNF343     | Hs00375483_m1 |
| CLVS2       | 134829         | clavesin 2                                                                          | CLVS2      | Hs01383800_m1 |
| CALCR       | 799            | calcitonin receptor                                                                 | CALCR      | Hs01016882_m1 |
| PCDHB10     | 56126          | protocadherin beta 10                                                               | PCDHB10    | Hs01585827_s1 |
| C3orf52     | 79669          | chromosome 3 open reading frame 52                                                  | C3orf52    | Hs00226345_m1 |
| FREM1       | 158326         | FRAS1 related extracellular matrix 1                                                | FREM1      | Hs00381549_m1 |
| SLC7A5      | 8140           | solute carrier family 7 (amino acid transporter light chain. L system), member 5    | SLC7A5     | Hs01001183_m1 |
| SLC22A24    | 283238         | solute carrier family 22, member 24                                                 | SLC22A24   | Hs00543210_m1 |
| SLC17A3     | 10786          | solute carrier family 17 (organic anion transporter), member 3                      | SLC17A3    | Hs00198361_m1 |
| SLC25A29    | 123096         | solute carrier family 25 (mitochondrial carnitine/acylcarnitine carrier), member 29 | SLC25A29   | Hs00936827_m1 |
| ITGB1BP1    | 9270           | integrin beta 1 binding protein 1                                                   | ITGB1BP1   | Hs01592320_g1 |
| CDH1        | 999            | cadherin 1, type 1, E-cadherin (epithelial)                                         | CDH1       | Hs01023894_m1 |
| CDH12       | 1010           | cadherin 12, type 2 (N-cadherin 2)                                                  | CDH12      | Hs00362037_m1 |
| VIM         | 7431           | vimentin                                                                            | VIM        | Hs00958111_m1 |
| ZEB1        | 6935           | zinc finger E-box binding homeobox 1                                                | ZEB1       | Hs00232783_m1 |
| ZEB2        | 9839           | zinc finger E-box binding homeobox 2                                                | ZEB2       | Hs00207691_m1 |
| S100A4      | 6275           | S100 calcium binding protein A4                                                     | S100A4     | Hs00243202_m1 |
| PPIA        | 5478           | peptidylprolyl isomerase A (cyclophilin A)                                          | PPIA       | Hs99999904_m1 |

Supplementary Table S4 Results of immunofluorescence staining of EMT markers in ccRCC samples.

|                            | Marker            | Weak positivity (%) | Strong positivity (%) |
|----------------------------|-------------------|---------------------|-----------------------|
| <b>Epithelial markers</b>  | E-cadherin (CDH1) | 74                  | 26                    |
|                            | CK-18             | 54.8                | 45.2                  |
|                            | CK-19             | 37                  | 63                    |
| <b>Mesenchymal markers</b> | vimentin          | 30.1                | 69.9                  |
|                            | S100A4            | 15.1                | 84.9                  |

Supplementary Table S5 List of miRNAs with significantly different expression between EMT+ and EMT- groups of ccRCC patients ( $P < 0.05$ ).

| miRNA             | logFC         | P-Value      |
|-------------------|---------------|--------------|
| <b>miR-200b*</b>  | <b>-2.921</b> | <b>0.003</b> |
| <b>miR-30b</b>    | <b>-1.019</b> | <b>0.005</b> |
| <b>miR-200a</b>   | <b>-1.840</b> | <b>0.006</b> |
| <b>miR-200b</b>   | <b>-1.397</b> | <b>0.010</b> |
| <b>miR-30a*</b>   | <b>-1.195</b> | <b>0.014</b> |
| <b>miR-30e*</b>   | <b>-1.042</b> | <b>0.019</b> |
| <b>miR-30e-3p</b> | <b>-1.019</b> | <b>0.019</b> |
| miR-192           | -1.530        | 0.019        |
| <b>miR-429</b>    | <b>-1.324</b> | <b>0.020</b> |
| <b>miR-130b*</b>  | <b>1.730</b>  | <b>0.021</b> |
| <b>miR-30c</b>    | <b>-0.836</b> | <b>0.022</b> |
| miR-190           | -1.360        | 0.024        |
| miR-486-3p        | -2.110        | 0.025        |
| miR-564           | 1.777         | 0.026        |
| <b>miR-630</b>    | <b>1.588</b>  | <b>0.027</b> |
| <b>miR-17*</b>    | <b>-1.657</b> | <b>0.030</b> |
| miR-204           | -1.723        | 0.031        |
| <b>miR-30a</b>    | <b>-1.044</b> | <b>0.031</b> |
| miR-139-5p        | -1.395        | 0.031        |
| <b>miR-192*</b>   | <b>-1.308</b> | <b>0.034</b> |
| miR-194           | -1.332        | 0.036        |
| <b>miR-200a*</b>  | <b>-1.700</b> | <b>0.042</b> |
| miR-140-3p        | -0.859        | 0.042        |
| miR-505           | -2.056        | 0.043        |
| miR-135a          | -2.377        | 0.046        |
| miR-486-5p        | -1.334        | 0.047        |

MiRNAs used in training phase are bold.

Supplementary Table S6 List of genes with significantly different expression between EMT+ and EMT- groups of ccRCC patients (P < 0.005).

| Gene symbol    | Gene name                                                                             | logFC        | AveExpr     | P.Value       |
|----------------|---------------------------------------------------------------------------------------|--------------|-------------|---------------|
| <b>SCD</b>     | <b>stearoyl-CoA desaturase (delta-9-desaturase)</b>                                   | <b>1,04</b>  | <b>7,33</b> | <b>0,0001</b> |
| <b>PAPSS2</b>  | <b>3'-phosphoadenosine 5'-phosphosulfate synthase 2</b>                               | <b>1,21</b>  | <b>6,14</b> | <b>0,0003</b> |
| <b>SEPT14</b>  | <b>septin 14</b>                                                                      | <b>0,91</b>  | <b>5,83</b> | <b>0,0004</b> |
| <b>KMO</b>     | <b>kynurenine 3-monooxygenase (kynurenine 3-hydroxylase)</b>                          | <b>2,26</b>  | <b>5,58</b> | <b>0,0004</b> |
| NCRNA00266     | non-protein coding RNA 266                                                            | 0,84         | 6,60        | 0,0005        |
| <b>ZNF343</b>  | <b>zinc finger protein 343</b>                                                        | <b>0,50</b>  | <b>5,05</b> | <b>0,0007</b> |
| <b>CLVS2</b>   | <b>clavesin 2</b>                                                                     | <b>-0,56</b> | <b>3,32</b> | <b>0,0010</b> |
| <b>CALCR</b>   | <b>calcitonin receptor</b>                                                            | <b>1,53</b>  | <b>3,91</b> | <b>0,0011</b> |
| <b>PCDHB10</b> | <b>protocadherin beta 10</b>                                                          | <b>0,68</b>  | <b>5,08</b> | <b>0,0013</b> |
| SEPT14         | septin 14                                                                             | 0,79         | 6,62        | 0,0013        |
| <b>C3orf52</b> | <b>chromosome 3 open reading frame 52</b>                                             | <b>-0,86</b> | <b>4,47</b> | <b>0,0014</b> |
| <b>FREM1</b>   | <b>FRAS1 related extracellular matrix 1</b>                                           | <b>-1,01</b> | <b>4,35</b> | <b>0,0015</b> |
| PCMTD2         | protein-L-isoaspartate (D-aspartate) O-methyltransferase domain containing 2          | 0,76         | 5,36        | 0,0015        |
| PCMTD2         | protein-L-isoaspartate (D-aspartate) O-methyltransferase domain containing 2          | 0,76         | 5,36        | 0,0015        |
| ERV3           | endogenous retroviral sequence 3                                                      | 0,61         | 7,06        | 0,0016        |
| GRB7           | growth factor receptor-bound protein 7                                                | -0,53        | 5,09        | 0,0018        |
| PCDHB13        | protocadherin beta 13                                                                 | 0,79         | 4,02        | 0,0019        |
| TTC1           | tetratricopeptide repeat domain 1                                                     | 0,69         | 5,45        | 0,0019        |
| PCDHB14        | protocadherin beta 14                                                                 | 0,69         | 5,48        | 0,0019        |
| RNF145         | ring finger protein 145                                                               | 0,64         | 6,14        | 0,0020        |
| PCDHB8         | protocadherin beta 8                                                                  | 0,78         | 3,11        | 0,0021        |
| TMEM167A       | transmembrane protein 167A                                                            | 0,54         | 6,61        | 0,0021        |
| CAPG           | capping protein (actin filament)                                                      | 0,75         | 6,20        | 0,0022        |
| GRK1           | G protein-coupled receptor kinase 1                                                   | -0,42        | 4,11        | 0,0022        |
| C17orf108      | chromosome 17 open reading frame 108                                                  | 0,54         | 2,88        | 0,0023        |
| TXNDC9         | thioredoxin domain containing 9                                                       | 0,46         | 4,85        | 0,0023        |
| PNPT1          | polyribonucleotide nucleotidyltransferase 1                                           | 0,52         | 5,63        | 0,0024        |
| ZNF117         | zinc finger protein 117                                                               | 0,65         | 6,01        | 0,0024        |
| AIF1L          | allograft inflammatory factor 1-like                                                  | -0,92        | 5,52        | 0,0024        |
| SLITRK5        | SLIT and NTRK-like family, member 5                                                   | -0,55        | 4,65        | 0,0027        |
| FARSB          | phenylalanyl-tRNA synthetase, beta subunit                                            | 0,55         | 5,85        | 0,0028        |
| CCL28          | chemokine (C-C motif) ligand 28                                                       | 1,45         | 6,51        | 0,0028        |
| VKORC1L1       | vitamin K epoxide reductase complex, subunit 1-like 1                                 | 0,64         | 5,07        | 0,0030        |
| BET1           | blocked early in transport 1 homolog (S. cerevisiae)                                  | 0,50         | 5,34        | 0,0031        |
| <b>SLC7A5</b>  | <b>solute carrier family 7 (cationic amino acid transporter, y+ system), member 5</b> | <b>0,80</b>  | <b>5,46</b> | <b>0,0031</b> |
| ZFP36L1        | zinc finger protein 36, C3H type-like 1                                               | -0,60        | 8,83        | 0,0031        |
| PDCL3          | phosducin-like 3                                                                      | 0,54         | 4,63        | 0,0032        |
| FLJ32742       | hypothetical locus FLJ32742                                                           | -1,08        | 3,57        | 0,0033        |
| FRG2C          | FSHD region gene 2 family, member C                                                   | -0,44        | 3,16        | 0,0034        |
| ANKRD34B       | ankyrin repeat domain 34B                                                             | -0,39        | 2,62        | 0,0035        |
| BCL2           | B-cell CLL/lymphoma 2                                                                 | -0,62        | 6,67        | 0,0035        |
| OR10W1         | olfactory receptor, family 10, subfamily W, member 1                                  | -0,37        | 3,94        | 0,0036        |

|                 |                                                                                 |              |             |               |
|-----------------|---------------------------------------------------------------------------------|--------------|-------------|---------------|
| HFE             | hemochromatosis                                                                 | 0,53         | 4,75        | 0,0038        |
| ERGIC1          | endoplasmic reticulum-golgi intermediate compartment (ERGIC) 1                  | 0,53         | 7,70        | 0,0038        |
| <b>SLC22A24</b> | <b>solute carrier family 22, member 24</b>                                      | <b>-0,81</b> | <b>3,66</b> | <b>0,0038</b> |
| PCDHB18         | protocadherin beta 18 pseudogene                                                | 0,65         | 5,24        | 0,0038        |
| TMCO2           | transmembrane and coiled-coil domains 2                                         | -0,37        | 3,06        | 0,0038        |
| NAA11           | N(alpha)-acetyltransferase 11, NatA catalytic subunit                           | -0,40        | 4,15        | 0,0039        |
| RASL10A         | RAS-like, family 10, member A                                                   | -0,45        | 4,47        | 0,0039        |
| CYP21A2         | cytochrome P450, family 21, subfamily A, polypeptide 2                          | -0,46        | 4,90        | 0,0040        |
| ODZ2            | odz, odd Oz/ten-m homolog 2 (Drosophila)                                        | -0,59        | 4,04        | 0,0041        |
| AGTPBP1         | ATP/GTP binding protein 1                                                       | 0,49         | 4,98        | 0,0042        |
| KIAA1715        | KIAA1715                                                                        | 0,89         | 6,59        | 0,0043        |
| OSR2            | odd-skipped related 2 (Drosophila)                                              | -0,43        | 4,28        | 0,0044        |
| <b>SLC17A3</b>  | <b>solute carrier family 17 (sodium phosphate), member 3</b>                    | <b>-2,47</b> | <b>7,41</b> | <b>0,0044</b> |
| AJAP1           | adherens junctions associated protein 1                                         | -0,60        | 4,61        | 0,0044        |
| PDE8B           | phosphodiesterase 8B                                                            | -0,57        | 4,77        | 0,0044        |
| AMIGO1          | adhesion molecule with Ig-like domain 1                                         | -0,46        | 5,67        | 0,0045        |
| ANPEP           | alanyl (membrane) aminopeptidase                                                | -1,32        | 8,63        | 0,0045        |
| TM6SF2          | transmembrane 6 superfamily member 2                                            | -0,71        | 5,80        | 0,0046        |
| PTCH2           | patched 2                                                                       | 0,81         | 2,91        | 0,0046        |
| FUT3            | fucosyltransferase 3 (galactoside 3(4)-L-fucosyltransferase, Lewis blood group) | -0,56        | 4,08        | 0,0046        |
| RASA3           | RAS p21 protein activator 3                                                     | 0,51         | 5,62        | 0,0047        |
| ANKRD2          | ankyrin repeat domain 2                                                         | -0,37        | 4,50        | 0,0050        |

Supplementary Table S7 Evaluation of the EMT-associated miRNAs the training phase of the study.

|                   | FC<br>(tu/par) | p-value            | Grading [p-<br>value] | Stage [p-<br>value] | OS [p-<br>value] |
|-------------------|----------------|--------------------|-----------------------|---------------------|------------------|
| miR-17*           | 1.152          | 0.053              | 0.031                 | 0.034               | 0.400            |
| <b>miR-30a-3p</b> | <b>0.328</b>   | <b>&lt; 0.0001</b> | <b>0.021</b>          | <b>0.065</b>        | <b>0.016</b>     |
| <b>miR-30a-5p</b> | <b>0.408</b>   | <b>0.0003</b>      | <b>0.045</b>          | <b>0.125</b>        | <b>0.050</b>     |
| miR-30b           | 0.550          | 0.002              | 0.016                 | 0.541               | 0.331            |
| miR-30c           | 0.408          | < 0.0001           | 0.028                 | 0.409               | 0.036            |
| miR-30d*          | 0.307          | < 0.0001           | 0.017                 | 0.472               | 0.177            |
| <b>miR-30e</b>    | <b>0.495</b>   | <b>0.001</b>       | <b>0.037</b>          | <b>0.072</b>        | <b>0.032</b>     |
| <b>miR-30e-3p</b> | <b>0.436</b>   | <b>0.0002</b>      | <b>0.046</b>          | <b>0.104</b>        | <b>0.304</b>     |
| miR-130b          | 1.333          | 0.006              | 0.303                 | 0.633               | 0.188            |
| miR-141           | 0.014          | < 0.0001           | 0.842                 | 0.795               | 0.957            |
| miR-192*          | 0.641          | 0.455              | 0.998                 | 0.981               | 0.313            |
| miR-193b          | 0.906          | 0.948              | 0.033                 | 0.188               | 0.092            |
| <b>miR-200a</b>   | <b>0.354</b>   | <b>&lt; 0.0001</b> | <b>0.218</b>          | <b>0.050</b>        | <b>0.002</b>     |
| miR-200a*         | 0.357          | < 0.0001           | 0.287                 | 0.088               | 0.086            |
| <b>miR-200b</b>   | <b>0.244</b>   | <b>&lt; 0.0001</b> | <b>0.368</b>          | <b>0.018</b>        | <b>0.019</b>     |
| miR-200b*         | 0.316          | < 0.0001           | 0.519                 | 0.138               | 0.014            |
| <b>miR-200c</b>   | <b>0.028</b>   | <b>&lt; 0.0001</b> | <b>0.671</b>          | <b>0.357</b>        | <b>0.224</b>     |
| miR-215           | 0.746          | 0.806              | 0.880                 | 0.466               | 0.550            |
| <b>miR-429</b>    | <b>0.161</b>   | <b>&lt; 0.0001</b> | <b>0.050</b>          | <b>0.009</b>        | <b>0.005</b>     |
| miR-630           | ND             | ND                 | ND                    | ND                  | ND               |

ND – not detectable

**MiRNAs used in validation phase are bold.**

Supplementary Table S8 Evaluation of the EMT-associated genes in the training phase of the study.

|                 | FC (tu/par)   | p-value            | Grading [p-value] | Stage [p-value] | OS [p-value] |
|-----------------|---------------|--------------------|-------------------|-----------------|--------------|
| <b>CDH1</b>     | <b>0.291</b>  | <b>&lt; 0.0001</b> | <b>0.047</b>      | <b>0.209</b>    | <b>0.004</b> |
| CHD12           | 0.014         | < 0.0001           | ND                | 0.715           | 0.584        |
| VIM             | 2.609         | < 0.0001           | 0.198             | 0.584           | 0.700        |
| ZEB1            | 1.369         | 0.379              | 0.038             | 0.232           | 0.156        |
| ZEB2            | 0.959         | 0.914              | 0.008             | 0.155           | 0.157        |
| S100A4          | 0.934         | 0.678              | 0.304             | 0.296           | 0.079        |
| SLC7A5          | 1.194         | 0.489              | 0.239             | 0.675           | 0.144        |
| <b>SLC22A24</b> | <b>0.159</b>  | <b>0.002</b>       | <b>0.011</b>      | <b>0.224</b>    | <b>0.155</b> |
| <b>SLC25A29</b> | <b>0.228</b>  | <b>&lt; 0.0001</b> | <b>0.572</b>      | <b>0.455</b>    | <b>0.042</b> |
| SLC17A3         | 2.514         | 0.224              | 0.131             | 0.732           | 0.111        |
| <b>SCD</b>      | <b>21.447</b> | <b>&lt; 0.0001</b> | <b>0.278</b>      | <b>0.014</b>    | <b>0.093</b> |
| <b>PAPSS2</b>   | <b>0.533</b>  | <b>0.0002</b>      | <b>0.259</b>      | <b>0.144</b>    | <b>0.000</b> |
| SEPT14          | ND            | ND                 | ND                | ND              | ND           |
| KMO             | 1.713         | 0.431              | 0.059             | 0.071           | 0.438        |
| CLVS2           | 3.664         | 0.256              | ND                | 0.219           | 0.846        |
| ZNF343          | 0.982         | 0.644              | 0.260             | 0.644           | 0.178        |
| CALCR           | 0.693         | 0.445              | 0.401             | 0.618           | 0.523        |
| PCDHB10         | 0.958         | 0.445              | 0.038             | 0.226           | 0.019        |
| <b>C3orf52</b>  | <b>0.148</b>  | <b>&lt; 0.0001</b> | <b>0.153</b>      | <b>0.001</b>    | <b>0.020</b> |
| <b>FREM1</b>    | <b>0.026</b>  | <b>&lt; 0.0001</b> | <b>0.007</b>      | <b>0.089</b>    | <b>0.033</b> |
| ITGB1BP1        | 0.635         | < 0.0001           | 0.461             | 0.363           | 0.175        |

ND – not detectable

Genes used in phase 3 are in bold



Supplementary Table S9 Significant survival predictors (EMT-associated miRNAs/mRNAs) selected by Cox regression model by stepwise selection.

| <b>fold</b> | <b>Significant predictors selected for Cox regression models by bidirectional stepwise selection</b>          | <b>AUC for training set (9/10 dataset)</b> | <b>AUC for validation set (1/10 dataset)</b> |
|-------------|---------------------------------------------------------------------------------------------------------------|--------------------------------------------|----------------------------------------------|
| 1           | miR-200a, miR-200b, miR-200c, miR-429, miR-30a-3p, CDH1, PAPSS2                                               | 0.72                                       | 0.68                                         |
| 2           | miR-200a, miR-200b, miR-200c, miR-429, miR-30a-3p, miR-30e-3p, CDH1                                           | 0.74                                       | 0.70                                         |
| 3           | miR-200a, miR-200b, miR-200c, miR-429, miR-30a-3p, CDH1, SLC7A5, PAPSS2                                       | 0.71                                       | 0.66                                         |
| 4           | miR-200a, miR-200b, miR-200c, miR-429, CDH1, PAPSS2                                                           | 0.70                                       | 0.76                                         |
| 5           | miR-200a, miR-200b, miR-200c, miR-429, miR-30a-5p, miR-30a-3p, CDH1, SLC25A29, PAPSS2, C3orf52                | 0.76                                       | 0.80                                         |
| 6           | miR-200a, miR-200b, miR-200c, miR-429, miR-30a-3p, CDH1, SLC7A5, SCD, PAPSS2, C3orf52                         | 0.76                                       | 0.80                                         |
| 7           | miR-200a, miR-200b, miR-200c, miR-429, miR-30a-5p, miR-30a-3p, miR-30a-3p, CDH1, SLC7A5, SCD, PAPSS2, C3orf52 | 0.75                                       | 0.66                                         |
| 8           | miR-200a, miR-200b, miR-200c, miR-429, CDH1, PAPSS2, C3orf52                                                  | 0.70                                       | 0.81                                         |
| 9           | miR-200a, miR-200b, miR-200c, miR-429, miR-30a,3p, miR-30e-3p, CDH1, PAPSS2, C3orf52                          | 0.74                                       | 0.70                                         |
| 10          | miR-200a, miR-200b, miR-200c, miR-429, miR-30a-3p, miR-30e-3p, CDH1, SLC7A5, PAPSS2                           | 0.73                                       | 0.63                                         |



## Supplementary Code 1

### Pseudocode of predictive analyses: Cox model & 5year overall survival

1. Dataset = patients from both cohorts with expression levels of 18 candidate transcripts (8 miRNAs and 10 genes)
2. denote: 0 = patient died until 5years, 1 = patient censored until 5years, 2 = patient survived 5 years timepoint
3. split patients into 10 folds with equivalent proportions of died until 5years (0), censored during 5years (1) and alive in 5years timepoint.
4. repeat for  $i$  in 1:10
  - a) VALIDATION\_ $i$  = patients in fold  $i$
  - b) TRAINING\_ $i$  = patients in all remaining folds (except  $i$ -th fold)
  - c) MODEL\_ $i$  = results of stepwise selection for Cox model applied on dataset TRAINING\_ $i$ , with 18 candidate predictors (model with minimal Akaike information criteria)
  - d) ROC\_ $i$  = survivalROC analysis for MODEL\_ $i$  on dataset VALIDATION\_ $i$  in timepoint  $t=5$ years
  - e) SIGNCANDIDATE\_ $i$  = candidates from MODEL\_ $i$
5. CANDIDATE\_FINAL = candidate transcripts, which occur at least 5-times in SIGNCANDIDATE\_ $_1$ , ..., SIGNCANDIDATE\_ $_10$
6. FULL\_MODEL = Cox model on all patients with predictors CANDIDATE\_FINAL
7. survivalROC analysis on FULL\_MODEL in timepoint  $t=5$ years; output: THRESHOLD=1.3497 based on Youden index and black ROC curve in fig. 4a,
8. bootstrap for censored data applied on FULL\_MODEL with 2000 replicate; output in table: standard errors of AUC, sensitivity, specificity and accuracy for FULL\_MODEL
9. AUC, sensitivity, specificity and accuracy for ROC\_ $_1$ , ..., ROC\_ $_10$  in timepoint  $t=5$ years; output in table: standard errors of AUC, sensitivity, specificity and accuracy
10. PRED\_INDV = individual predictions of FULL\_MODEL
11. CATEGORY – split patients into 2 subsets
  - a) “HIGHrisk” – patients with PRED\_INDV  $\geq$  THRESHOLD
  - b) “LOWrisk” – patients with PRED\_INDV  $<$  THRESHOLD
12. plot Kaplan-Meier curves for CATEGORY in fig.4b
13. CLIN\_MODEL=Cox model with predictors gender and stage
- 14 plot individual predictions of CLIN\_MODEL with fixed gender::MALE; output fig. 4d
15. MIXED\_MODEL = Cox model with predictors gender, stage, CATEGORY
16. plot individual predictions of MIXED\_MODEL with fixed gender::MALE and stage::1 (red lines), stage::2 (blue lines), stage::3 (green lines), stage::4 (black lines); output fig. 4e

## Supplementary figures

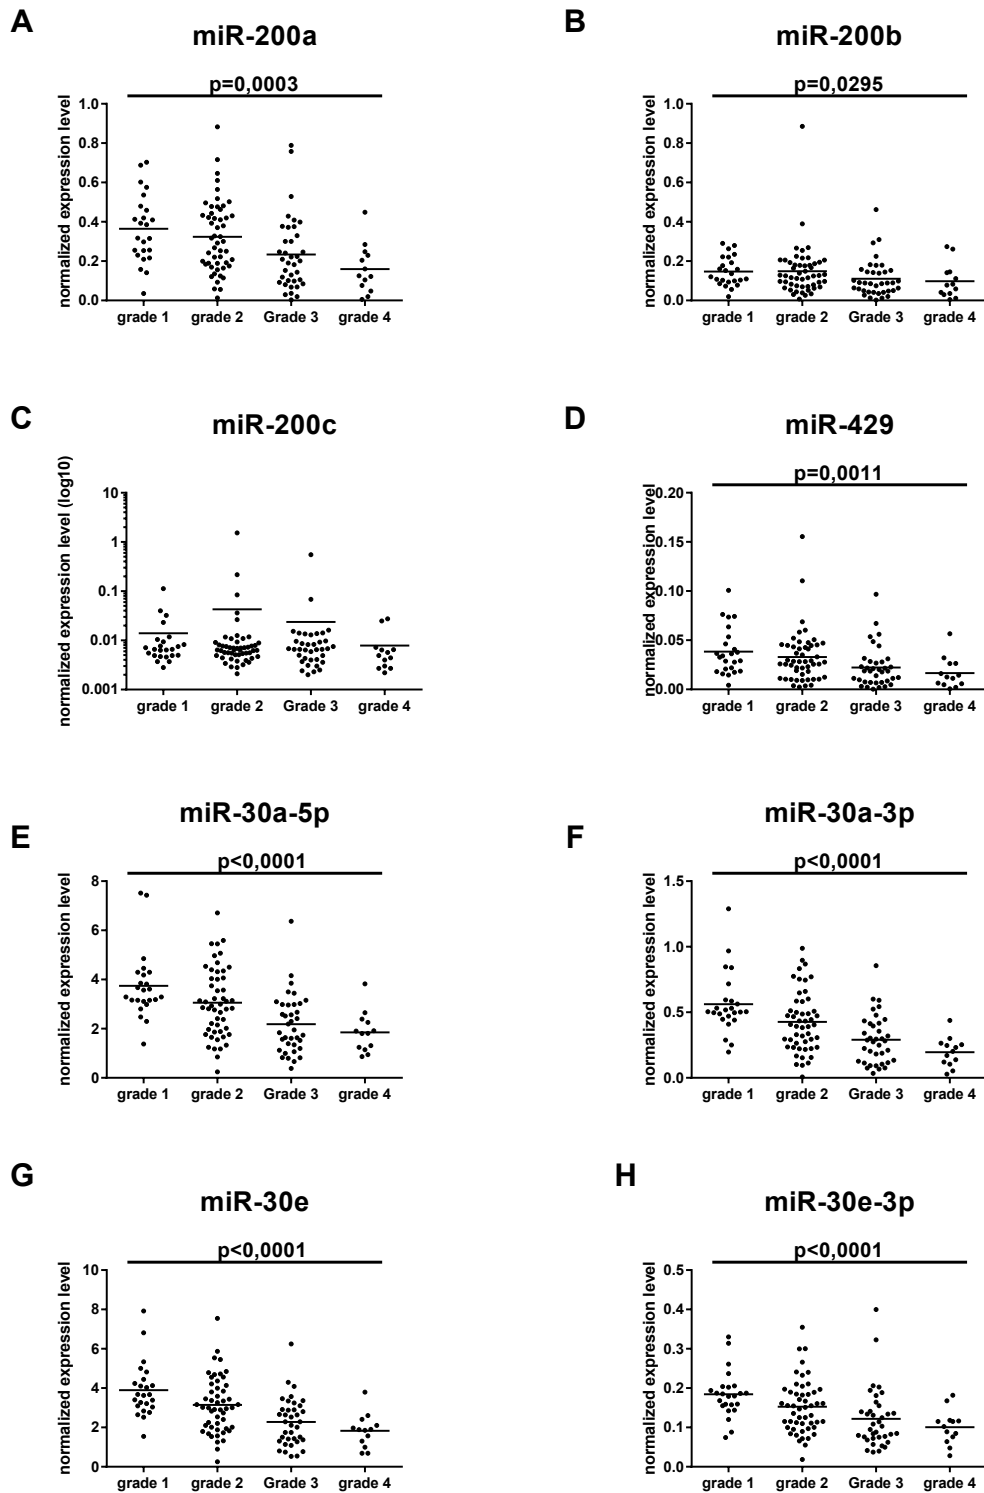

Supplementary Figure S1 EMT-associated miRNAs in relationship to Fuhrman grades in the validation phase of the study. P-value was reached by Kruskal-Wallis test.

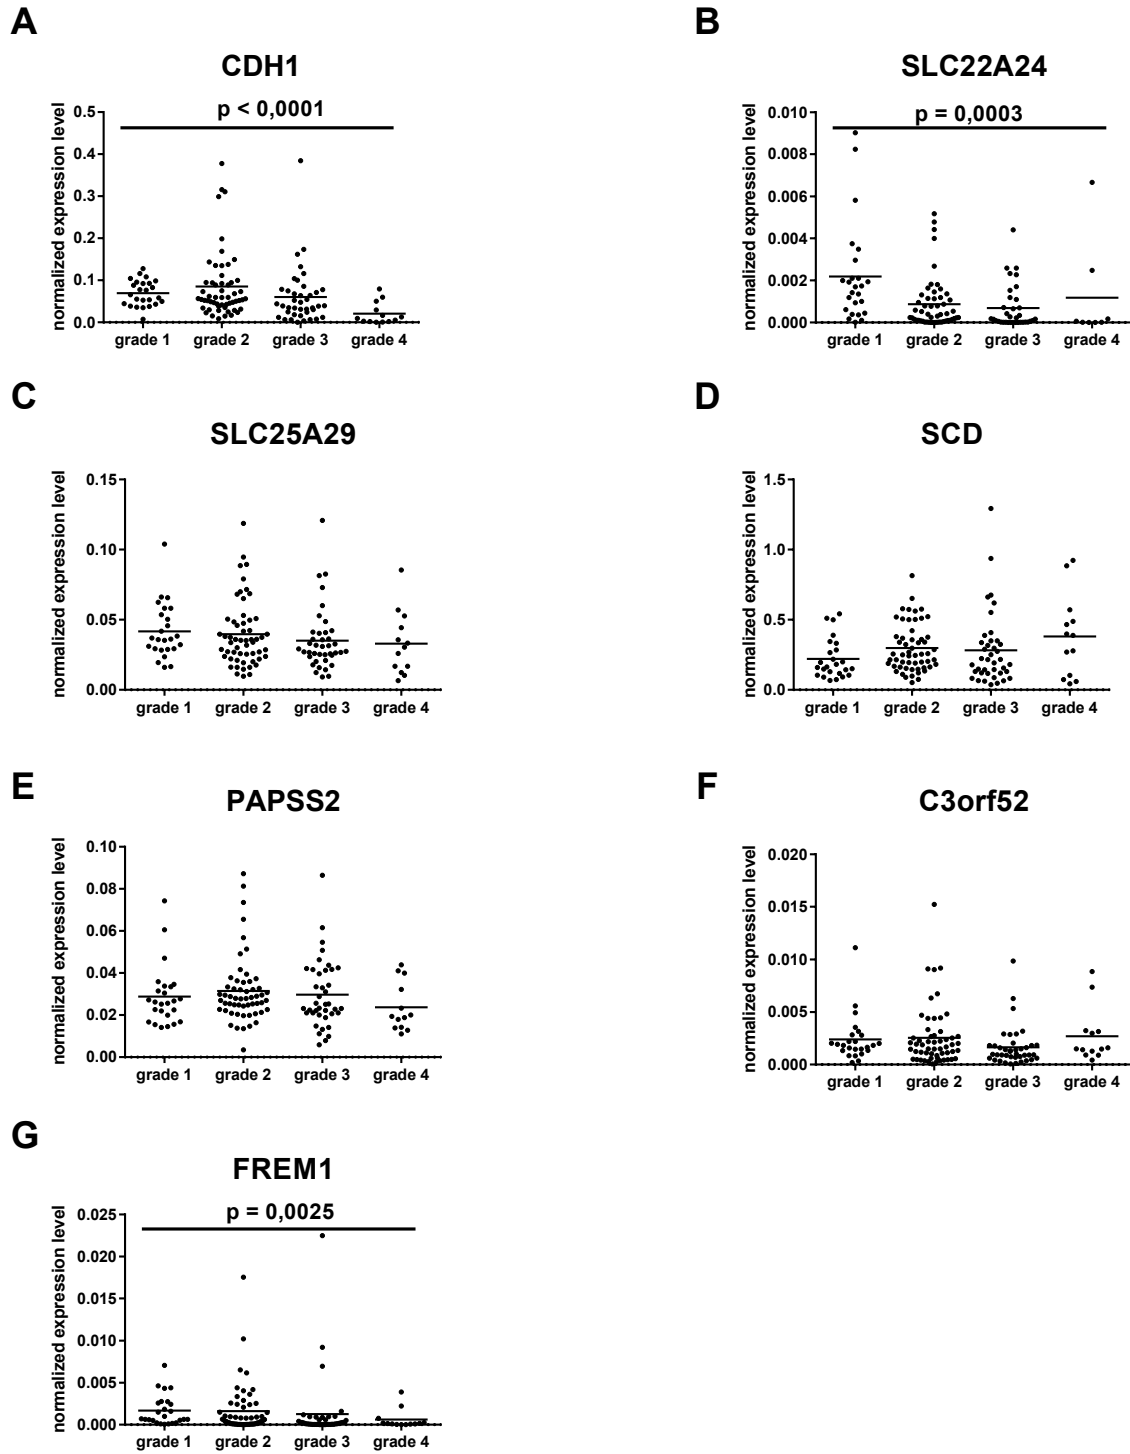

Supplementary Figure S2 EMT-associated genes in relationship to Fuhrman grades in the validation phase of the study. P-value was reached by Kruskal-Wallis test.
